# Supplementary material for: How does regulating doctors’ admissions affect health expenditures? Evidence from Switzerland
Source: BMC Health Serv Res. 2022 Apr 13;22:495. doi: 10.1186/s12913-022-07735-7 (PMC9008894; doi:10.1186/s12913-022-07735-7)
Supplement: Supplementary file 1 — Additional file 1 Supplementary materials. [file 12913_2022_7735_MOESM1_ESM.pdf]

## RESEARCH

# How does regulating doctors' admissions affect health expenditures? Evidence from Switzerland

Michel Fuino<sup>1</sup>, Philipp Trein<sup>2\*</sup> and Joël Wagner<sup>1,3</sup>

## Supplementary materials

This section presents supplementary materials with additional information on our analysis.

### A. Comments on the available data

Original data are gathered by matching the ZSR doctor identifiers with the amounts invoiced to health insurers in each month and each canton by specialty as registered in the SASIS data pool. Therefore, this database offers an accurate estimation of the number of doctors billing in free practice by specialty established within one canton and of the related health costs. The available data contain the counts of unique doctor identifiers in each month and in each canton by specialty. The entry reporting the location refers to the canton of work, or, more precisely to the canton where the invoice has been issued. Further, the month of a record represents the month of invoice issuance. Doctors billing services in different cantons have a different ZSR in each canton. Also, one ZSR may bill services in different specialties. Overall, we cannot sum up the cantonal (specialty) counters for the whole Switzerland as we cannot control for duplicate individual doctors among cantons (specialties). Therefore, we only present aggregate figures for the health costs on the level of the whole country (sum of costs from all cantons) but not for the number of doctors (the sum of the cantonal counters would overestimate the true headcount). The health costs from both SP (Figure 1a) and GP (Figure 1b) have increased over time. Seasonal effects appear since doctors tend to send invoices to insurers at the end of each billing period. Further, dashed lines inform about the moratorium removal and reintroduction dates.

Note that the Swiss cantons and their abbreviations are as follows: Aargau (AG), Appenzell Innerrhoden (AI), Appenzell Ausserrhoden (AR), Basel-Landschaft (BL), Basel-Stadt (BS), Bern (BE), Fribourg (FR), Geneva (GE), Glarus (GL), Graubünden (GR), Jura (JU), Lucerne (LU), Neuchâtel (NE), Nidwalden (NW), Obwalden (OW), Schaffhausen (SH), Schwyz (SZ), Solothurn (SO), St. Gallen (SG), Thurgau (TG), Ticino (TI), Uri (UR), Valais (VS), Vaud (VD), Zug (ZG), and Zurich (ZH).

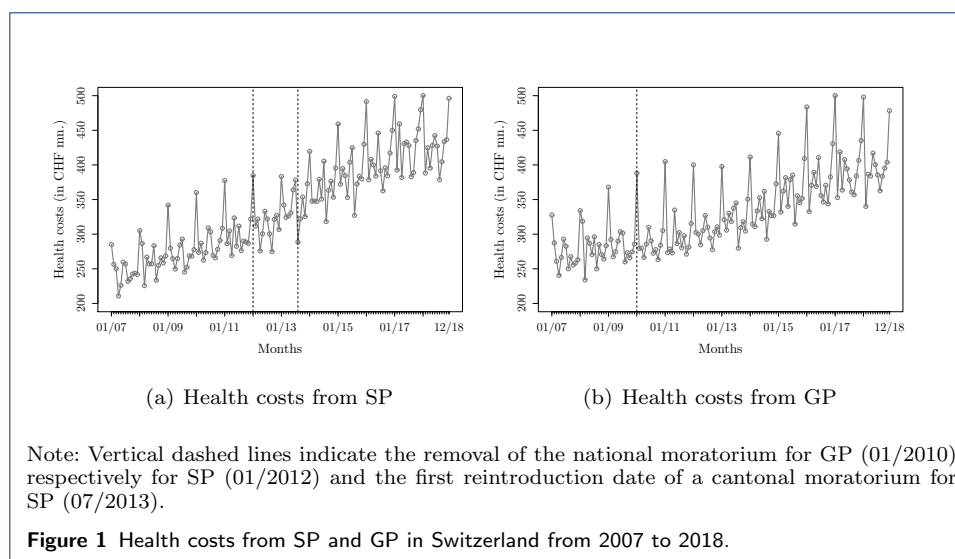

## B. Descriptive statistics

In Table 1, we report the health costs from SP and GP by canton over the period from 2007 to 2018. We observe that the health costs from doctors have strongly increased over the years in each canton. For the overall Switzerland (row “CH”), health expenditures for SP (GP) are of 2 942 CHF mn. (3 252 CHF mn.) in 2007 and increase to 5 154 CHF mn. (4 836 CHF mn.) in 2018. In comparison, the permanent resident population in Switzerland (row “Pop.”) is of 7 593 th. and 8 542 th. at the same dates. Therefore, during the 12 years in the observation period, the sum of SP and GP health costs in Switzerland have been multiplied by about 1.6 (9 990/6 194) while the population has only increased by a factor of 1.1 (8 542/7 593). Such outcome shows that the costs by inhabitant have significantly increased over the years.

|      | 2007  |       | 2008  |       | 2009  |       | 2010  |       | 2011  |       | 2012  |       | 2013  |       | 2014  |       | 2015  |       | 2016  |       | 2017  |       | 2018  |       |
|------|-------|-------|-------|-------|-------|-------|-------|-------|-------|-------|-------|-------|-------|-------|-------|-------|-------|-------|-------|-------|-------|-------|-------|-------|
|      | SP    | GP    |
| AG   | 173   | 189   | 191   | 195   | 202   | 199   | 220   | 203   | 228   | 211   | 240   | 219   | 260   | 235   | 281   | 244   | 296   | 268   | 308   | 275   | 323   | 289   | 324   | 294   |
| AI   | 4     | 4     | 4     | 8     | 4     | 8     | 4     | 8     | 5     | 8     | 5     | 8     | 5     | 8     | 5     | 8     | 5     | 9     | 6     | 10    | 6     | 10    | 6     | 10    |
| AR   | 16    | 26    | 17    | 28    | 18    | 29    | 18    | 29    | 19    | 29    | 19    | 29    | 21    | 30    | 23    | 30    | 25    | 32    | 26    | 34    | 26    | 34    | 26    | 36    |
| BE   | 334   | 451   | 366   | 470   | 381   | 476   | 400   | 476   | 422   | 480   | 444   | 491   | 485   | 515   | 512   | 530   | 545   | 579   | 575   | 596   | 600   | 613   | 598   | 619   |
| BL   | 131   | 141   | 142   | 151   | 143   | 152   | 150   | 153   | 154   | 157   | 159   | 160   | 182   | 169   | 187   | 173   | 197   | 185   | 205   | 189   | 216   | 192   | 205   | 197   |
| BS   | 87    | 59    | 92    | 62    | 97    | 67    | 99    | 68    | 101   | 72    | 103   | 75    | 114   | 80    | 115   | 83    | 121   | 89    | 124   | 92    | 129   | 94    | 124   | 96    |
| FR   | 94    | 76    | 103   | 78    | 112   | 81    | 120   | 81    | 122   | 83    | 129   | 88    | 142   | 93    | 150   | 98    | 157   | 112   | 158   | 127   | 169   | 134   | 174   | 140   |
| GE   | 262   | 157   | 278   | 166   | 284   | 170   | 299   | 174   | 310   | 183   | 332   | 188   | 367   | 202   | 386   | 208   | 413   | 228   | 431   | 236   | 454   | 257   | 449   | 251   |
| GL   | 11    | 24    | 11    | 25    | 12    | 26    | 12    | 26    | 12    | 26    | 12    | 26    | 12    | 27    | 14    | 27    | 16    | 29    | 16    | 30    | 16    | 32    | 15    | 31    |
| GR   | 47    | 88    | 50    | 89    | 52    | 89    | 55    | 89    | 57    | 91    | 59    | 90    | 66    | 96    | 70    | 97    | 74    | 105   | 79    | 108   | 79    | 110   | 79    | 110   |
| JU   | 19    | 16    | 21    | 17    | 21    | 17    | 23    | 19    | 25    | 19    | 26    | 20    | 30    | 21    | 32    | 22    | 35    | 24    | 39    | 25    | 41    | 25    | 39    | 25    |
| LU   | 110   | 209   | 115   | 215   | 115   | 221   | 118   | 225   | 122   | 227   | 131   | 235   | 140   | 242   | 149   | 247   | 158   | 263   | 166   | 271   | 176   | 282   | 176   | 289   |
| NE   | 62    | 41    | 68    | 43    | 67    | 41    | 66    | 41    | 70    | 43    | 72    | 45    | 79    | 46    | 88    | 48    | 102   | 53    | 110   | 54    | 115   | 56    | 121   | 56    |
| NW   | 10    | 21    | 11    | 22    | 12    | 22    | 13    | 22    | 13    | 22    | 14    | 22    | 15    | 23    | 15    | 25    | 16    | 26    | 16    | 27    | 18    | 27    | 18    | 29    |
| OW   | 7     | 21    | 8     | 23    | 8     | 23    | 8     | 23    | 9     | 23    | 10    | 23    | 11    | 23    | 11    | 24    | 12    | 25    | 13    | 26    | 14    | 26    | 14    | 26    |
| SG   | 161   | 262   | 168   | 268   | 177   | 275   | 187   | 279   | 198   | 289   | 206   | 295   | 229   | 305   | 247   | 315   | 260   | 328   | 269   | 336   | 277   | 344   | 278   | 347   |
| SH   | 27    | 31    | 30    | 31    | 31    | 31    | 34    | 32    | 34    | 32    | 37    | 33    | 38    | 33    | 39    | 34    | 43    | 36    | 46    | 38    | 48    | 38    | 46    | 40    |
| SO   | 92    | 147   | 100   | 153   | 103   | 155   | 109   | 156   | 111   | 156   | 117   | 157   | 126   | 162   | 137   | 166   | 139   | 177   | 143   | 183   | 147   | 189   | 145   | 188   |
| SZ   | 49    | 85    | 52    | 88    | 56    | 93    | 57    | 92    | 60    | 93    | 63    | 97    | 66    | 101   | 71    | 105   | 78    | 114   | 81    | 119   | 87    | 123   | 86    | 130   |
| TC   | 65    | 129   | 71    | 133   | 72    | 134   | 77    | 135   | 83    | 136   | 88    | 139   | 98    | 146   | 106   | 149   | 119   | 157   | 126   | 161   | 132   | 165   | 131   | 169   |
| TI   | 130   | 101   | 137   | 102   | 141   | 103   | 148   | 106   | 152   | 112   | 157   | 115   | 175   | 125   | 192   | 131   | 210   | 147   | 226   | 153   | 238   | 157   | 247   | 163   |
| UR   | 8     | 23    | 9     | 22    | 11    | 22    | 11    | 22    | 12    | 22    | 12    | 21    | 11    | 21    | 11    | 21    | 11    | 23    | 10    | 23    | 10    | 25    | 10    | 25    |
| VD   | 271   | 200   | 297   | 212   | 306   | 215   | 331   | 223   | 344   | 230   | 367   | 240   | 393   | 249   | 417   | 257   | 454   | 290   | 499   | 300   | 528   | 307   | 531   | 308   |
| VS   | 91    | 82    | 98    | 91    | 103   | 93    | 112   | 94    | 119   | 100   | 122   | 102   | 131   | 108   | 143   | 115   | 146   | 132   | 144   | 147   | 158   | 149   | 166   | 150   |
| ZG   | 44    | 51    | 47    | 53    | 48    | 55    | 51    | 57    | 52    | 57    | 54    | 58    | 58    | 61    | 62    | 64    | 69    | 71    | 69    | 74    | 71    | 77    | 71    | 80    |
| ZH   | 637   | 615   | 678   | 642   | 714   | 660   | 760   | 671   | 784   | 697   | 805   | 739   | 857   | 797   | 943   | 837   | 985   | 899   | 1 035 | 954   | 1 086 | 1 003 | 1 075 | 1 027 |
| CH   | 2 942 | 3 252 | 3 164 | 3 387 | 3 290 | 3 457 | 3 482 | 3 504 | 3 618 | 3 598 | 3 783 | 3 715 | 4 111 | 3 918 | 4 406 | 4 058 | 4 685 | 4 401 | 4 910 | 4 588 | 5 164 | 4 758 | 5 154 | 4 836 |
| Pop. | 7 593 |       | 7 702 |       | 7 786 |       | 7 870 |       | 7 955 |       | 8 039 |       | 8 140 |       | 8 238 |       | 8 327 |       | 8 420 |       | 8 484 |       | 8 542 |       |

Note: Health costs are reported in CHF mn. The row “Pop.” indicates the permanent resident population in Switzerland and is expressed in th.

**Table 1** Health costs from SP and GP by cantons from 2007 to 2018.

|                                                 | 2007    | 2008    | 2009    | 2010    | 2011    | 2012    | 2013    | 2014    | 2015    | 2016    | 2017    | 2018    |
|-------------------------------------------------|---------|---------|---------|---------|---------|---------|---------|---------|---------|---------|---------|---------|
| Nominal GDP (in CHF mn.)                        | 592 442 | 617 696 | 607 377 | 629 325 | 641 200 | 648 981 | 660 649 | 672 818 | 675 736 | 685 441 | 693 694 | 719 614 |
| Unemployment rate (in %)                        | -       | -       | -       | 4.8     | 4.4     | 4.5     | 4.7     | 4.8     | 4.8     | 4.9     | 4.8     | 4.7     |
| Average age of the population (in years)        | 40.5    | 40.7    | 40.9    | 41.1    | 41.2    | 41.3    | 41.5    | 41.8    | 41.8    | 41.9    | 42.1    | 42.3    |
| Female-to-male ratio (in %)                     | 1.02    | 1.02    | 1.02    | 1.02    | 1.01    | 1.01    | 1.01    | 1.01    | 1.01    | 1.00    | 1.00    | 1.00    |
| Households health payments (in CHF)             | 2 008.0 | 2 029.1 | 2 069.3 | 2 093.9 | 2 082.2 | 2 151.3 | 2 150.0 | 2 271.2 | 2 322.3 | 2 458.0 | 2 488.3 | 2 691.3 |
| Number of hospital beds (per 1 000 inhabitants) | 4.9     | 4.9     | 4.8     | 4.7     | 4.6     | 4.6     | 4.5     | 4.3     | 4.3     | 4.3     | 4.2     | 4.2     |

**Table 2** Selected economic indicators for Switzerland from 2007 to 2018.

|    | Number of GP billing in free practice |           |            |              | Health costs from GP |           |       |              |
|----|---------------------------------------|-----------|------------|--------------|----------------------|-----------|-------|--------------|
|    | Intercept                             | Month     | Rem.       | Month × Rem. | Intercept            | Month     | Rem.  | Month × Rem. |
| AG | 7.736 ***                             | .015 ***  | .019       | .005         | 16.582 ***           | .007      | -.039 | .031 ***     |
| AI | 5.015 ***                             | .027 **   | -.076      | -.002        | 13.389 ***           | .021      | -.298 | -.010        |
| AR | 5.946 ***                             | .017 **   | .321 *     | -.007        | 14.639 ***           | .017      | .138  | -.014        |
| BE | 7.701 ***                             | -.000     | -.071      | .013 **      | 17.455 ***           | .006      | -.166 | .014         |
| BL | 6.921 ***                             | .007 *    | -.048      | .005         | 16.315 ***           | .011      | -.061 | .010         |
| BS | 6.837 ***                             | .016 ***  | -1.106 *** | -.015 *      | 15.504 ***           | .037 ***  | -.213 | .007         |
| FR | 7.042 ***                             | .026 ***  | -.187      | .008         | 15.677 ***           | .011      | -.202 | .026 **      |
| GE | 7.018 ***                             | -.008     | -.335 *    | .039 ***     | 16.434 ***           | .018 **   | -.128 | .021 *       |
| GL | 5.485 ***                             | .016      | -.133      | .019         | 14.551 ***           | .017      | -.172 | -.007        |
| GR | 6.752 ***                             | .014 ***  | -.170      | .012 *       | 15.763 ***           | -.012     | -.021 | .032         |
| JU | 5.713 ***                             | -.001     | .013       | .024 **      | 14.147 ***           | .008      | .776  | .013         |
| LU | 7.053 ***                             | -.067 *** | .516 *     | .081 ***     | 16.676 ***           | .003      | .220  | .015         |
| NE | 6.293 ***                             | .007      | -.114      | .007         | 14.979 ***           | -.026     | .181  | .057 ***     |
| NW | 5.825 ***                             | .021 ***  | -.265      | -.003        | 14.348 ***           | -.009     | .364  | .010         |
| OW | 5.423 ***                             | .019 **   | .083       | .021 *       | 14.434 ***           | .009      | -.247 | -.002        |
| SG | 7.271 ***                             | .001      | .055       | .021 ***     | 16.887 ***           | -.002     | .352  | .020         |
| SH | 5.938 ***                             | .020 ***  | -.255      | .019 **      | 14.725 ***           | -.007     | .287  | .014         |
| SO | 7.225 ***                             | .017 ***  | -.220      | .007         | 16.330 ***           | .005      | .063  | .001         |
| SZ | 6.866 ***                             | .021 ***  | -.192      | .016 **      | 15.806 ***           | .015      | -.084 | .007         |
| TG | 6.916 ***                             | .010 *    | -.198      | .019 ***     | 16.167 ***           | -.006     | .192  | .021         |
| TI | 6.656 ***                             | .016 **   | -.278      | .024 ***     | 15.912 ***           | -.007     | .110  | .051 ***     |
| UR | 5.296 ***                             | .040 ***  | -.826 **   | -.017        | 14.330 ***           | -.050 *** | .731  | .027         |
| VD | 7.488 ***                             | .021 ***  | -.155      | .005         | 16.660 ***           | .011      | .154  | .021         |
| VS | 7.054 ***                             | .014 *    | .005       | .009         | 15.845 ***           | .034 **   | -.286 | .004         |
| ZG | 6.607 ***                             | .021 ***  | -.025      | .003         | 15.306 ***           | .019 *    | .009  | -.001        |
| ZH | 8.057 ***                             | .009 ***  | .017       | .000         | 17.781 ***           | .012      | -.151 | .033 ***     |
| CH |                                       |           |            |              | 19.434 ***           | .007      | -.009 | .021 *       |

Note: Results are based on 78 months including 36 months before (01/2007–12/2009) and 42 months after (01/2010–06/2013) the removal of the moratorium for GP, see Figure ???. The displayed values for the coefficients for “Month”, “Rem.” and “Month × Rem.” are multiplied by 10. Values account for the seasonal effect. Significance levels are indicated as follows: \*  $p < 0.1$ , \*\*  $p < 0.05$ , \*\*\*  $p < 0.01$ . **Table 3** Regression results by cantons for the GP national moratorium removal in January 2010.

### C. Regression results for the removal of the national moratorium for GP

In Table 3 we report our analysis of the removal of the moratorium for GP. The “Month”-coefficient is not always statistically significant meaning an unclear picture regarding the overall growth rate of the number of GP billing in free practice. Additionally, only in few cantons the removal and the interaction term are relevant. The interaction term has a significant positive effect in six cantons, concerning essentially border cantons (GE, LU, JU, SG, TG, TI, and SZ) and cantons with large hospitals (BE, GE). This observation could hint that the moratorium removal influenced the immigration of GP into Switzerland from neighboring countries.

In the right-hand side of Table 3, we report the results estimating the effect on the GP health costs. Apart from the intercept, in most cantons no other coefficient is statistically significant. In particular, the time variable (“Month”) demonstrates that health costs remained stable during the whole observation period. Only in NE, TI, and ZH, we find a significantly positive interaction term coefficient. Thus, observations for GP are mostly aligned with findings from SP (Table ???), indicating that the moratorium removal (alone) did not increase further health expenditures.

### D. Reintroduction of cantonal moratoriums for SP

In addition to the results presented in the main text of the article, the representation in Figure 2(a) illustrates that, for GE, before the moratorium reintroduction, a yearly growth of 8.11% in the number of doctors billing in free practice is observed. After the reintroduction, this rate was reduced to 1.56%. In Figure 2(b), the lower slope for costs in GE is not statistically significant (see Table 3 in the main article).

### E. Regression results for SP health costs by specialty

In Table 4, we present the regression results for SP health costs by specialty for both the removal and reintroduction of the moratorium. We only report results for

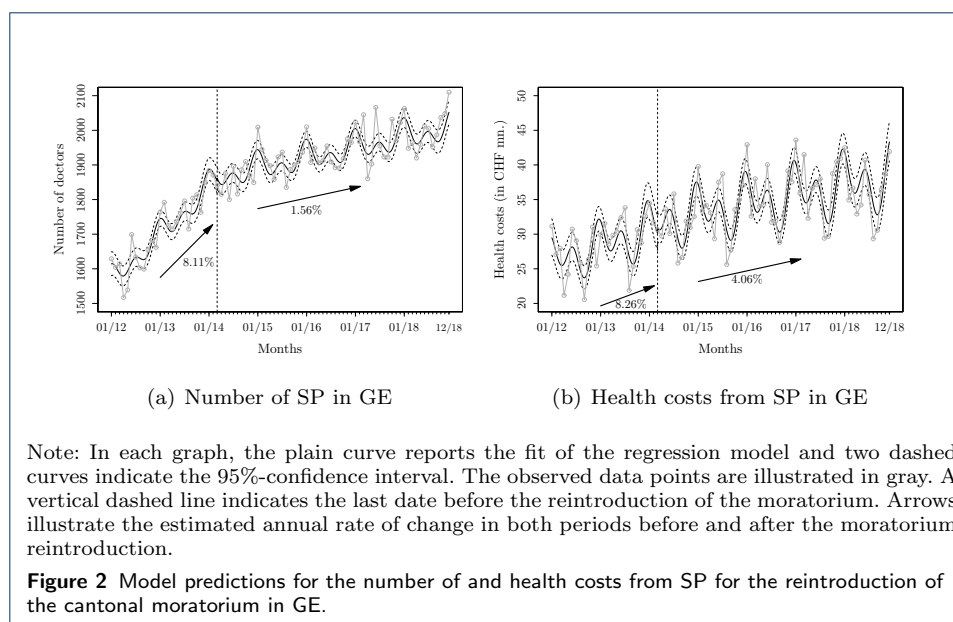

|                                            | Removal of the national moratorium for SP |          |            |              | Reintroduction of cantonal moratoriums for SP |          |            |                |
|--------------------------------------------|-------------------------------------------|----------|------------|--------------|-----------------------------------------------|----------|------------|----------------|
|                                            | Intercept                                 | Month    | Rem.       | Month × Rem. | Intercept                                     | Month    | Reint.     | Month × Reint. |
| Allergology and clinical immunology        | 14.652 ***                                | .012 **  | -.738 **   | .046 ***     | 14.496 ***                                    | .026 *   | .488       | -.010          |
| Anesthesiology                             | 14.977 ***                                | .096 *** | -.531      | -.003        | 14.483 ***                                    | .103 *** | 1.886 ***  | -.055 *        |
| Angiology                                  | 15.137 ***                                | .021 *** | -.017      | .019         | 14.816 ***                                    | .031 *   | .047       | .020           |
| Cardiology                                 | 16.425 ***                                | .025 *** | .051       | .004         | 16.138 ***                                    | .055 *** | .213       | -.003          |
| Surgery                                    | 15.583 ***                                | -.007    | .396       | .018         | 15.262 ***                                    | .035 **  | -.199      | -.034 **       |
| Maxillo-facial surgery                     | 13.408 ***                                | .023 *** | -.099      | .019         | 12.910 ***                                    | .062 **  | .031       | -.002 **       |
| Orthopaedic surgery, traumatology          | 15.819 ***                                | .025 *** | .394       | .009         | 15.608 ***                                    | .066 *** | .625       | -.032          |
| Plastic, reconstructive, aesthetic surgery | 14.450 ***                                | .059 *** | .869 ***   | .007         | 14.372 ***                                    | .072 *** | .424       | -.042 *        |
| Dermatology and venereology                | 16.447 ***                                | .034 *** | .562       | .003         | 16.159 ***                                    | .051 *** | .355       | -.010          |
| Endocrinology and diabetology              | 15.200 ***                                | .017 *** | -.112      | .056 ***     | 15.033 ***                                    | .052 *** | -.204      | -.064 ***      |
| Gastroenterology                           | 16.489 ***                                | .032 *** | .226       | .021         | 16.190 ***                                    | .039 **  | .936 *     | -.015          |
| Gynecology and obstetrics                  | 17.360 ***                                | .029 *** | -.034      | -.003        | 16.997 ***                                    | .033 **  | .312       | -.015          |
| Hematology                                 | 14.516 ***                                | .009     | 1.046 **   | .138 ***     | 14.664 ***                                    | .086 *** | -.568      | -.058 *        |
| Physical medicine and rehabilitation       | 14.544 ***                                | .053 *** | -1.001 *** | -.013        | 14.052 ***                                    | .035 **  | -1.399 *** | -.010          |
| Physicians, special cases                  | 13.965 ***                                | .003     | -2.527 **  | -.069        | 13.129 ***                                    | -.070    | 1.923 **   | .063           |
| Nephrology                                 | 15.068 ***                                | -.001    | 1.920 **   | -.115        | 14.453 ***                                    | .009     | -.385      | .012           |
| Neurosurgery                               | 13.587 ***                                | .021 *** | -.604      | .255 *       | 13.765 ***                                    | .182 *** | .624       | -.171 ***      |
| Neurology                                  | 15.751 ***                                | .049 *** | .268       | .011         | 15.425 ***                                    | .081 *** | .191       | -.022          |
| Medical oncology                           | 16.615 ***                                | .044 *** | -1.025 *** | .034         | 16.261 ***                                    | .052 *** | -.348      | -.027          |
| Ophthalmology                              | 17.416 ***                                | .048 *** | -.006      | .050 **      | 17.222 ***                                    | .110     | .554       | -.063 ***      |
| Otorhinolaryngology                        | 15.987 ***                                | .009 **  | .316       | .052 ***     | 15.722 ***                                    | .051 *** | .122       | -.031 ***      |
| Pathology                                  | 15.355 ***                                | .100 *** | .259       | -.077 ***    | 15.028 ***                                    | .066 *** | .463       | .056 ***       |
| Pneumology                                 | 15.539 ***                                | .009 *   | .003       | .007         | 15.248 ***                                    | .005     | .357       | .049 **        |
| Psychiatry and psychotherapy               | 17.659 ***                                | .043 *** | .181       | .009         | 17.405 ***                                    | .063 *** | .294       | -.023 **       |
| — of children and adolescents              | 15.476 ***                                | .040 *** | .480       | .030         | 15.241 ***                                    | .051 *** | .404       | .004           |
| Radiology                                  | 17.062 ***                                | .053 *** | -.122      | .049 **      | 16.855 ***                                    | .071 *** | .178       | -.055 ***      |
| Rheumatology                               | 16.431 ***                                | .029 *** | .198       | .007         | 16.033 ***                                    | .049 *** | .279       | -.025          |
| Urology                                    | 15.568 ***                                | .006 *   | .030       | .010         | 15.299 ***                                    | .039 *   | .248       | .009           |

Note: Results for the moratorium removal are based on 78 months including 60 months before (01/2007–12/2011) and 18 months after (01/2012–06/2013) the removal of the moratorium for SP, see Figure 1 in the main document. Results for the moratorium reintroduction are based on 84 months from 01/2012 to 12/2018 including the canton-specific reintroduction dates. The results concerning the reintroduction of cantonal moratoriums are based on data from the 18 relevant cantons only. The displayed values for the coefficients for “Month”, “Rem.” and “Month × Rem.” respectively “Reint.” and “Month × Reint.” are multiplied by 10. Values account for the seasonal effect. Significance levels are indicated as follows: \*  $p < 0.1$ , \*\*  $p < 0.05$ , \*\*\*  $p < 0.01$ .

**Table 4** Regression results for health costs by specialty for the SP national moratorium removal in January 2012 and the SP moratorium reintroduction in 18 cantons.

specialties where on average at least 100 doctors have billed medical services in each month. While the analysis on the removal of the national moratorium uses health costs from all 26 cantons, the study on the reintroduction of cantonal moratoriums only considers the costs from the 18 cantons that have reintroduced the regulation. On the one hand, our results show that removing the moratorium augmented the costs increase from some specialists, such as allergology and clinical immunology, endocrinology and diabetology, and radiology. On the other hand, the reintroduction of the moratorium reduced the costs from these same specialties as well as from other disciplines. Nevertheless, regarding some specialties, such as pathology and

pneumology, costs increased after re-introduction of the moratorium. Overall, we cannot confirm a strong cause-effect relationship of the moratorium policies and the increase in health costs, also because in many specialties particular effects that we do not control for may have a more important impact.

#### F. Regression results for SP per cantonal population

In the following, we discuss the regression results for SP health costs and for the number of SP billing in free practice when divided by the monthly cantonal population. In Table 5, we present the results for SP health costs divided by the monthly cantonal population on the same period for both the removal and reintroduction of the moratorium. As a robustness test of the results presented in the paper, we highlight here that using the SP health costs divided by the monthly cantonal population has no significant effect on the results compared to the findings presented in Tables 1 and 2. Our results show that the health costs in most cantons were not affected by the moratorium removal even when accounting for the population size. We come to the same conclusion when considering the moratorium reintroduction effect on the health costs per capita.

|    | Removal of the national moratorium for SP |          |         |              |  | Reintroduction of the cantonal moratoriums for SP |           |           |                |  |
|----|-------------------------------------------|----------|---------|--------------|--|---------------------------------------------------|-----------|-----------|----------------|--|
|    | Intercept                                 | Month    | Rem.    | Month × Rem. |  | Intercept                                         | Month     | Reint.    | Month × Reint. |  |
| AG | 5.867 ***                                 | .048 *** | -.038   | .004         |  |                                                   |           |           |                |  |
| AI | 3.175 ***                                 | .026 *** | .191    | -.011        |  |                                                   |           |           |                |  |
| AR | .890 ***                                  | .010     | -.161   | .042 **      |  |                                                   |           |           |                |  |
| BE | 4.821 ***                                 | .034 *** | .223    | .010         |  | 4.981 ***                                         | .058 ***  | .141      | -.029 *        |  |
| BL | 4.197 ***                                 | .023 *** | -.328   | .082 ***     |  | 4.373 ***                                         | .093 ***  | -.018     | -.073 ***      |  |
| BS | 2.115 ***                                 | .019 *** | -.223   | .044         |  | 2.234 ***                                         | .078 **   | -.159     | -.063 **       |  |
| FR | 3.575 ***                                 | .034 *** | -.421 * | .031         |  |                                                   |           |           |                |  |
| GE | 3.983 ***                                 | .017 *** | .166    | .066 **      |  | 4.175 ***                                         | .054 ***  | .271      | -.034 *        |  |
| GL | 3.260 ***                                 | .022 *** | .009    | -.068 *      |  | 3.178 ***                                         | -.043     | 1.494 *** | .065 **        |  |
| GR | 3.170 ***                                 | .029 *** | -.020   | .035         |  |                                                   |           |           |                |  |
| JU | 3.354 ***                                 | .045 *** | -.587   | .101 **      |  |                                                   |           |           |                |  |
| LU | 3.228 ***                                 | .002     | .707 ** | .018         |  | 3.351 ***                                         | .028      | .377      | .003           |  |
| NE | 3.462 ***                                 | .007     | .374    | .036         |  | 3.587 ***                                         | .036      | 1.007 **  | .027           |  |
| NW | 3.231 ***                                 | .028 *** | -.207   | .061 *       |  | 3.356 ***                                         | .072 ***  | -.340     | -.040          |  |
| OW | 3.018 ***                                 | .042 *** | .443    | -.001        |  | 3.113 ***                                         | .018      | .220      | .031           |  |
| SG | 3.489 ***                                 | .028 *** | .116    | .021         |  | 3.582 ***                                         | .040 **   | .926      | -.017          |  |
| SH | 3.600 ***                                 | .032 *** | .456    | -.041 *      |  | 3.614 ***                                         | -.029     | .736      | .059 **        |  |
| SO | 4.114 ***                                 | .022 *** | -.017   | .029         |  | 4.207 ***                                         | .043 **   | .574      | -.033 *        |  |
| SZ | 2.934 ***                                 | .028 *** | .190    | -.003        |  | 3.004 ***                                         | .023      | .607      | .012           |  |
| TG | 2.976 ***                                 | .035 *** | .341    | .012         |  | 3.119 ***                                         | .054 ***  | .668      | -.011          |  |
| TI | 3.877 ***                                 | .014 *** | -.098   | .047 *       |  | 3.988 ***                                         | .054 ***  | .522      | -.009          |  |
| UR | 3.367 ***                                 | .079 *** | -.443   | -.174 ***    |  | 3.153 ***                                         | -.080 *** | -.021     | .073 ***       |  |
| VD | 4.476 ***                                 | .029 *** | .093    | .020         |  | 4.566 ***                                         | .036 *    | .212      | .008           |  |
| VS | 2.580 ***                                 | .033 *** | -.166   | .014         |  | 2.641 ***                                         | .038      | .284      | -.016          |  |
| ZG | 3.599 ***                                 | .016 *** | -.094   | .032 ***     |  |                                                   |           |           |                |  |
| ZH | 3.820 ***                                 | .024 *** | .086    | -.010        |  |                                                   |           |           |                |  |

Note: Results for the moratorium removal are based on 78 months including 60 months before (01/2007–12/2011) and 18 months after (01/2012–06/2013) the removal of the moratorium for SP, see Figure 1 in the main document. Results for the moratorium reintroduction are based on 84 months from 01/2012 to 12/2018 including the canton-specific reintroduction dates. The results concerning the reintroduction of cantonal moratoriums are based on data from the 18 relevant cantons only. The displayed values for the coefficients for “Month”, “Rem.” and “Month × Rem.” respectively “Reint.” and “Month × Reint.” are multiplied by 10. Values account for the seasonal effect. Significance levels are indicated as follows: \*  $p < 0.1$ , \*\*  $p < 0.05$ , \*\*\*  $p < 0.01$ .

**Table 5** Regression results for health costs by cantons for the SP national moratorium removal in January 2012 and the SP moratorium reintroduction in 18 cantons.

Similarly, in Table 6, we present the regression results for the number of SP billing in free practice divided by the monthly cantonal population on the same period for both the removal and reintroduction of the moratorium. Let us also mention that the model specification has been changed since, after division, the outcome variable is no more a counting process that can be modeled by a negative binomial distribution. We modified the previous outcome variable (number of doctors) into a ratio. We ran

the model selection procedure again and found that, among the tested models, the Gaussian specification has the lowest AIC. Further, as seen in the table, coefficient values become small. In this case, our results show that the number of SP billing in free practice costs in most cantons were affected by the moratorium removal even when accounting for the population size. We come to the same conclusion when considering the moratorium reintroduction effect on the number of SP per capita. Such results are coherent with what we observe when solely focusing on the number of SP.

|    | Removal of the national moratorium for SP |           |           |              | Reintroduction of the cantonal moratoriums for SP |          |          |                |
|----|-------------------------------------------|-----------|-----------|--------------|---------------------------------------------------|----------|----------|----------------|
|    | Intercept                                 | Month     | Rem.      | Month × Rem. | Intercept                                         | Month    | Reint.   | Month × Reint. |
| AG | .053 ***                                  | .001 ***  | -.011     | .002 ***     |                                                   |          |          |                |
| AI | .014 ***                                  | .000 ***  | -.005     | -.000        |                                                   |          |          |                |
| AR | .001 ***                                  | .000 ***  | -.000     | .000         |                                                   |          |          |                |
| BE | .009 ***                                  | .000 ***  | -.002 *   | .000 ***     | .010 ***                                          | .001 *** | -.000    | -.000 ***      |
| BL | .006 ***                                  | .000 ***  | -.001     | .000 *       | .007 ***                                          | .000 *** | .002 *** | -.000 ***      |
| BS | .001 ***                                  | -.000     | -.000 **  | .000 ***     | .001 ***                                          | .000 *** | .000 *   | -.000 ***      |
| FR | .006 ***                                  | .000 ***  | -.002 **  | .000 ***     |                                                   |          |          |                |
| GE | .003 ***                                  | -.000     | .001 ***  | .000 ***     | .004 ***                                          | .000 *** | -.000    | -.000 ***      |
| GL | .010 ***                                  | .000 ***  | .001      | -.000 ***    | .010 ***                                          | -.000    | .009 *** | .000 ***       |
| GR | .006 ***                                  | .000 ***  | -.003 *** | .000 *       |                                                   |          |          |                |
| JU | .007 ***                                  | .000 ***  | -.000     | .000 ***     |                                                   |          |          |                |
| LU | .004 ***                                  | -.000 *** | .001      | .000 ***     | .004 ***                                          | .000 *** | .002 *** | -.000 *        |
| NE | .004 ***                                  | .000 ***  | -.000     | .000 *       | .005 ***                                          | .000 **  | .002 **  | -.000 **       |
| NW | .010 ***                                  | .000      | .001      | -.000        | .010 ***                                          | -.000    | .006 *** | .000 ***       |
| OW | .009 ***                                  | .000 **   | .001      | -.000        | .009 ***                                          | .000     | .004     | .000           |
| SG | .004 ***                                  | .000 ***  | -.000     | .000 ***     | .004 ***                                          | .000 *** | .002 *** | -.000 ***      |
| SH | .008 ***                                  | .000 ***  | -.003 *   | .000 ***     | .008 ***                                          | .000 *** | .003 **  | -.000 **       |
| SO | .012 ***                                  | .000 ***  | -.003 **  | .000 ***     | .012 ***                                          | .000 *** | .006 *** | -.000 ***      |
| SZ | .005 ***                                  | .000 ***  | -.001     | .000 **      | .006 ***                                          | .000 *** | .002 *   | -.000 **       |
| TG | .004 ***                                  | .000 ***  | -.001     | .000 **      | .004 ***                                          | .000 *** | .002 **  | -.000 **       |
| TI | .004 ***                                  | .000 ***  | -.001     | .000 **      | .004 ***                                          | .000 *** | .002 *** | -.000 ***      |
| UR | .008 ***                                  | .000 ***  | .001      | -.000 **     | .008 ***                                          | -.000    | .003     | .000 **        |
| VD | .008 ***                                  | .000 ***  | -.000     | .000 ***     | .008 ***                                          | .000 *** | .002 **  | -.000 **       |
| VS | .002 ***                                  | .000 ***  | .000      | .000         | .002 ***                                          | .000 *** | .000     | -.000          |
| ZG | .009 ***                                  | .000 **   | .000      | .000 ***     |                                                   |          |          |                |
| ZH | .003 ***                                  | -.000     | -.000     | .000 ***     |                                                   |          |          |                |

Note: Results for the moratorium removal are based on 78 months including 60 months before (01/2007–12/2011) and 18 months after (01/2012–06/2013) the removal of the moratorium for SP, see Figure 1 in the main document. Results for the moratorium reintroduction are based on 84 months from 01/2012 to 12/2018 including the canton-specific reintroduction dates. The results concerning the reintroduction of cantonal moratoriums are based on data from the 18 relevant cantons only. The displayed values for the coefficients for “Month”, “Rem.” and “Month × Rem.” respectively “Reint.” and “Month × Reint.” are multiplied by 10. Values account for the seasonal effect. Significance levels are indicated as follows: \*  $p < 0.1$ , \*\*  $p < 0.05$ , \*\*\*  $p < 0.01$ .

**Table 6** Regression results for the number of SP billing in free practice for the SP national moratorium removal in January 2012 and the SP moratorium reintroduction in 18 cantons.

### G. Difference-in-differences model for the reintroduction of the national moratorium for SP health costs

In the following, we use a difference-in-differences (DID) model for the reintroduction of the national moratorium for SP health costs. The theoretical foundation of this methodology is well documented and can be found in, e.g., [1]. In our approach, we estimate two distinct DID models that we distinguish by a divergence in treatment groups. First, in the model “DID (1)”, our treatment group is composed of the cantons that reintroduced the moratorium while our control group consists of cantons that did not reintroduce the moratorium. Second, in the model “DID (2)”, the treatment group only accounts for cantons having reintroduced the moratorium in 07/2013 while the control group remains unchanged. In doing so, the second approach allows for having a balanced analysis. The following equation describes both models:

$$\log(C_t) = \beta_0 + \beta_1 \text{Month}_t + \beta_2 \text{CReint}_t + \beta_3 \text{Month}_t \times \text{CReint}_t + \text{Seasonality}_t + \epsilon_t,$$

where the variables  $C_t$ ,  $\text{Month}_t$  and  $\epsilon_t$  are as defined in Section 2.2. The variables  $\text{CReint}_t$  is a binary indicator taking the value of 1 for cantons having reintroduced the moratorium (treatment group) and 0 otherwise (control group). Further, the variable  $\text{Month}_t \times \text{CReint}_t$  represents the interaction effect and is the key measure for evaluating the effect of the moratorium reintroduction on the SP health costs. In our model selection process, we compare this model to similar DID models that include a higher order polynomial form. More precisely, we have compared the AIC values of the presented model (1) with a model adding the quadratic form of the time variable ( $\text{Month}_t^2$ ) and a model adding both its quadratic and cubic forms (i.e.  $\text{Month}_t^2$  and  $\text{Month}_t^3$ ). These models have reported AIC values of 7401, 7401 and 7402, respectively, therefore not showing any model improvement. Further, we come to the same conclusion when comparing BIC values. Based on this analysis and the fact that coefficient values and significance levels are quasi identical, we decided to remain with the linear form. We present the results in Table 7.

|         | Intercept |     |  | Month |   | CReint |   | Month $\times$ CReint |  |
|---------|-----------|-----|--|-------|---|--------|---|-----------------------|--|
| DID (1) | 15.420    | *** |  | .004  | * | .237   | * | -.000                 |  |
| DID (2) | 15.449    | *** |  | .004  | * | -.275  | * | .000                  |  |

Note: The notation “DID (1)” refers to a DID model performed on the overall set of cantons while “DID (2)” identifies a balanced DID model where, in the treatment group, solely the cantons having reintroduced the moratorium in 07/2013 are considered.

**Table 7** Difference-in-differences (DID) model results for health costs for the SP national moratorium reintroduction.

As a key result, we observe that the variable  $\text{Month} \times \text{CReint}$  is not significant, neither in the “DID (1)” nor in the “DID (2)” model. This confirms the absence of an effect of the moratorium reintroduction on health costs. Further, we have performed the DID on the cantons with at least 150'000 inhabitants (BE, GE, ZH, VD and AG) where small sample effects can be excluded. The results are presented in Table 8.

|         | Intercept |     |  | Month |     | CReint |   | Month $\times$ CReint |  |
|---------|-----------|-----|--|-------|-----|--------|---|-----------------------|--|
| DID (1) | 17.379    | *** |  | .004  | *** | -.159  | * | .000                  |  |
| DID (2) | 17.379    | *** |  | .004  | *** | -.209  |   | .001                  |  |

Note: The notation “DID (1)” refers to a DID model performed on the overall set of cantons while “DID (2)” identifies a balanced DID model where, in the treatment group, solely the cantons having reintroduced the moratorium in 07/2013 are considered.

**Table 8** Difference in differences (DID) model results for health costs for the SP national moratorium reintroduction considering AG, BE, GE, VD, ZH.

## H. Confidence intervals

In the following, we present the confidence intervals for the regression results presented in the main corpus of the manuscript. This will benefit to the present analysis since it will give some indication whether observed null-effects are stemming from real null-effects or simply from small sample size, i.e. lack of power. In Tables 9 and 10, we present the confidence intervals for the regression results presented in Table 1 and Table 3 in the main document, respectively. For the moratorium removal, the confidence intervals for the number of SP interaction terms ( $\text{Month} \times \text{Rem.}$ ) exclude, in most cases, the null-effect. The opposite is observed with the

health costs from SP. When considering the moratorium reintroduction, we still observe that most of the interaction terms' confidence intervals exclude the null effect for the number of SP. Again, the opposite is observed for the health costs from SP. These results reflect the conclusions obtained when using  $p$ -values.

|    | Number of SP billing in free practice |       |       |       |        |       |              |       | Health costs from SP |        |       |       |       |       |              |       |
|----|---------------------------------------|-------|-------|-------|--------|-------|--------------|-------|----------------------|--------|-------|-------|-------|-------|--------------|-------|
|    | Intercept                             |       | Month |       | Rem.   |       | Month × Rem. |       | Intercept            |        | Month |       | Rem.  |       | Month × Rem. |       |
|    | Lower                                 | Upper | Lower | Upper | Lower  | Upper | Lower        | Upper | Lower                | Upper  | Lower | Upper | Lower | Upper | Lower        | Upper |
| AG | 7.932                                 | 7.959 | .018  | .026  | -.512  | .064  | .012         | .059  | 16.716               | 16.786 | .004  | .006  | -.036 | .103  | -.007        | .004  |
| AI | 5.394                                 | 5.462 | .016  | .036  | -1.216 | .273  | -.076        | .046  | 12.783               | 12.900 | .001  | .005  | -.070 | .168  | -.014        | .006  |
| AR | 6.112                                 | 6.160 | .016  | .030  | -1.211 | .165  | -.025        | .061  | 14.191               | 14.274 | .001  | .004  | -.066 | .107  | -.006        | .008  |
| BE | 7.827                                 | 7.855 | .013  | .021  | -.577  | .021  | .009         | .058  | 17.314               | 17.387 | .003  | .005  | -.016 | .128  | -.007        | .004  |
| BL | 7.066                                 | 7.095 | .012  | .021  | -.537  | .104  | .004         | .056  | 16.289               | 16.373 | .001  | .004  | -.078 | .092  | -.000        | .013  |
| BS | 6.915                                 | 6.948 | -.002 | .008  | -.619  | .096  | .019         | .078  | 15.876               | 15.959 | .001  | .004  | -.070 | .102  | -.005        | .009  |
| FR | 7.420                                 | 7.450 | .026  | .035  | -.598  | .045  | .014         | .066  | 16.102               | 16.177 | .004  | .006  | -.072 | .077  | -.005        | .007  |
| GE | 7.305                                 | 7.331 | .004  | .012  | -.051  | .503  | .046         | .091  | 16.986               | 17.080 | .001  | .004  | -.049 | .135  | -.003        | .011  |
| GL | 5.955                                 | 6.015 | .022  | .040  | -.548  | .740  | -.083        | .023  | 13.781               | 13.887 | .001  | .004  | -.073 | .154  | -.019        | .000  |
| GR | 6.976                                 | 7.018 | .021  | .034  | -.995  | -.077 | .023         | .098  | 15.300               | 15.393 | .002  | .005  | -.063 | .125  | -.007        | .008  |
| JU | 6.229                                 | 6.279 | .015  | .029  | -.561  | .503  | -.001        | .085  | 14.464               | 14.571 | .003  | .006  | -.127 | .085  | -.000        | .016  |
| LU | 7.182                                 | 7.235 | -.015 | -.000 | -.406  | .740  | .012         | .106  | 16.040               | 16.132 | -.000 | .003  | .016  | .198  | -.008        | .006  |
| NE | 6.632                                 | 6.676 | .013  | .026  | -.569  | .381  | .006         | .083  | 15.469               | 15.581 | -.001 | .003  | -.036 | .188  | -.008        | .010  |
| NW | 5.990                                 | 6.043 | -.001 | .015  | -.428  | .726  | -.057        | .038  | 13.810               | 13.911 | .002  | .005  | -.086 | .120  | -.004        | .012  |
| OW | 5.724                                 | 5.785 | .010  | .028  | -.673  | .645  | -.036        | .071  | 13.462               | 13.566 | .004  | .007  | -.028 | .173  | -.011        | .005  |
| SG | 7.422                                 | 7.454 | .012  | .021  | -.480  | .218  | .017         | .074  | 16.533               | 16.630 | .002  | .005  | -.049 | .145  | -.008        | .007  |
| SH | 6.368                                 | 6.422 | .025  | .041  | -.949  | .216  | .001         | .096  | 14.812               | 14.898 | .003  | .005  | .000  | .172  | -.013        | .000  |
| SO | 7.452                                 | 7.483 | .018  | .027  | -.592  | .081  | .005         | .060  | 15.982               | 16.065 | .002  | .004  | -.047 | .121  | -.007        | .007  |
| SZ | 7.210                                 | 7.245 | .023  | .033  | -.579  | .158  | .001         | .061  | 15.342               | 15.443 | .002  | .005  | -.043 | .160  | -.011        | .005  |
| TG | 7.090                                 | 7.124 | .019  | .029  | -.527  | .218  | -.010        | .051  | 15.657               | 15.756 | .002  | .006  | -.021 | .173  | -.008        | .007  |
| TI | 6.912                                 | 6.956 | .017  | .030  | -.568  | .374  | -.002        | .075  | 16.282               | 16.358 | .001  | .004  | -.046 | .107  | -.004        | .008  |
| UR | 5.608                                 | 5.678 | .014  | .035  | -.570  | .934  | -.109        | .015  | 13.786               | 13.899 | .006  | .010  | -.124 | .115  | -.030        | -.010 |
| VD | 7.807                                 | 7.829 | .021  | .028  | -.247  | .227  | .004         | .043  | 17.103               | 17.194 | .003  | .005  | -.041 | .134  | -.007        | .006  |
| VS | 7.409                                 | 7.451 | .026  | .038  | -.529  | .387  | -.018        | .057  | 16.044               | 16.126 | .004  | .006  | -.069 | .093  | -.008        | .005  |
| ZG | 6.863                                 | 6.911 | .010  | .024  | -.459  | .559  | -.013        | .070  | 15.213               | 15.294 | .001  | .004  | -.051 | .114  | -.006        | .007  |
| ZH | 8.164                                 | 8.185 | .009  | .015  | -.441  | .016  | .034         | .072  | 17.937               | 18.009 | .003  | .005  | -.029 | .117  | -.010        | .002  |
| CH |                                       |       |       |       |        |       |              |       | 19.465               | 19.532 | 0.025 | 0.046 | -.064 | 0.073 | -0.033       | 0.075 |

Note: Results are based on 78 months including 60 months before (01/2007–12/2011) and 18 months after (01/2012–06/2013) the removal of the moratorium for SP, see Figure 1, main document. The notations “Lower” and “Upper” refer to the lower and upper bounds of the 95%-confidence interval

**Table 9** Confidence intervals for the regression results presented in Table 1 in the main document.

|    | Number of SP billing in free practice |       |       |       |        |       |                |       | Health costs from SP |        |       |       |        |       |                |       |
|----|---------------------------------------|-------|-------|-------|--------|-------|----------------|-------|----------------------|--------|-------|-------|--------|-------|----------------|-------|
|    | Intercept                             |       | Month |       | Reint. |       | Month × Reint. |       | Intercept            |        | Month |       | Reint. |       | Month × Reint. |       |
|    | Lower                                 | Upper | Lower | Upper | Lower  | Upper | Lower          | Upper | Lower                | Upper  | Lower | Upper | Lower  | Upper | Lower          | Upper |
| BE | 7.932                                 | 7.977 | .004  | .008  | -.024  | .030  | -.005          | -.002 | 17.455               | 17.588 | .002  | .011  | -.060  | .098  | -.008          | .002  |
| BL | 7.140                                 | 7.190 | .003  | .007  | .003   | .060  | -.006          | -.001 | 16.448               | 16.601 | .003  | .017  | -.086  | .088  | -.015          | -.001 |
| BS | 6.986                                 | 7.039 | .003  | .008  | -.002  | .058  | -.007          | -.002 | 15.977               | 16.123 | .001  | .016  | -.094  | .071  | -.014          | .001  |
| GE | 7.510                                 | 7.545 | .005  | .008  | -.020  | .023  | -.006          | -.004 | 17.171               | 17.314 | .002  | .012  | -.051  | .121  | -.009          | .001  |
| GL | 5.936                                 | 6.041 | -.006 | .004  | .033   | .152  | -.002          | .009  | 13.625               | 13.892 | -.017 | .009  | .010   | .303  | -.007          | .020  |
| LU | 7.287                                 | 7.357 | .002  | .008  | .008   | .088  | -.005          | .001  | 16.135               | 16.313 | -.005 | .012  | -.057  | .142  | -.008          | .009  |
| NE | 6.723                                 | 6.794 | .002  | .007  | .004   | .089  | -.005          | .001  | 15.569               | 15.764 | -.003 | .012  | .000   | .220  | -.006          | .010  |
| NW | 5.977                                 | 6.065 | -.005 | .003  | .015   | .114  | -.000          | .009  | 13.916               | 14.077 | -.001 | .016  | -.124  | .057  | -.012          | .004  |
| OW | 5.756                                 | 5.868 | -.003 | .008  | -.016  | .110  | -.005          | .006  | 13.507               | 13.722 | -.008 | .014  | -.093  | .146  | -.008          | .014  |
| SG | 7.503                                 | 7.559 | .003  | .008  | .022   | .085  | -.006          | -.001 | 16.601               | 16.770 | -.004 | .014  | .004   | .190  | -.011          | .007  |
| SH | 6.451                                 | 6.537 | .003  | .011  | -.009  | .088  | -.008          | .001  | 14.793               | 14.978 | -.011 | .007  | -.026  | .179  | -.004          | .015  |
| SO | 7.513                                 | 7.565 | .002  | .007  | .019   | .078  | -.005          | -.000 | 16.063               | 16.207 | -.001 | .012  | -.023  | .139  | -.010          | .003  |
| SZ | 7.286                                 | 7.352 | .002  | .008  | -.007  | .069  | -.005          | .001  | 15.369               | 15.582 | -.007 | .013  | -.053  | .184  | -.009          | .011  |
| TG | 7.162                                 | 7.223 | .003  | .008  | .019   | .089  | -.005          | .000  | 15.783               | 15.966 | -.002 | .015  | -.025  | .179  | -.011          | .007  |
| TI | 7.009                                 | 7.073 | .003  | .008  | .020   | .093  | -.006          | .000  | 16.361               | 16.552 | -.002 | .016  | -.049  | .164  | -.010          | .008  |
| UR | 5.589                                 | 5.704 | -.005 | .005  | -.024  | .109  | -.002          | .008  | 13.530               | 13.745 | -.017 | .001  | -.128  | .125  | -.002          | .016  |
| VD | 7.882                                 | 7.919 | .003  | .006  | .010   | .052  | -.004          | .000  | 17.169               | 17.351 | -.004 | .014  | -.071  | .132  | -.009          | .010  |
| VS | 7.472                                 | 7.550 | .001  | .008  | -.032  | .056  | -.005          | .003  | 16.060               | 16.269 | -.005 | .016  | -.082  | .152  | -.013          | .008  |

Note: Results are based on 84 months from 01/2012 to 12/2018 including the canton-specific reintroduction dates of the moratorium for SP, see Figure ???. The notations “Lower” and “Upper” refer to the lower and upper bounds of the 95%-confidence interval.

**Table 10** Confidence intervals for the regression results presented in Table 3, main document.

## I. Supplementary analyses and validation tests

In the following, we provide a set of statistical diagnostics to measure the validity and performance of our models. First, we discuss the goodness-of-fit by comparing AIC values between applicable models and by analyzing model residuals. Second, we provide rationales for the interrupted time series linearity assumption. Third, we present the results of a falsification test, which we implemented on the period prior the moratorium removal. Fourth, for the moratorium reintroduction, we apply our model to a control group and compare the results with the treatment group. Finally, we present out-of-sample predictions based on the data prior moratorium removal and compare them with our model prediction.

*Goodness-of-fit:* In Table 11, we present the AIC values when fitting the observed data for the response variables measuring the number of doctors billing in free practice  $N_t$  and health costs from doctors  $C_t$  to selected distributions. Considering the relevant observation periods for the removal and reintroduction of the moratorium (01/2007–06/2013 and 01/2012–12/2018), we separately assess the case of SP and GP. For the number of doctors billing in free practice, we report the goodness-of-fit on the negative binomial and Poisson distributions, while we present results for log-normal and Weibull distributions fitted on the health costs. In our procedure, we have also considered the binomial and geometric distributions for  $N_t$  and the exponential, normal and Gamma distributions for  $C_t$ . In all cases, we find that the negative binomial distribution best fits the number of doctors in terms of AIC, while the log-normal distribution outperforms the Weibull distribution and is best suited for health costs.

The analysis of residuals is a relevant statistical tool for evaluating the goodness-of-fit of the interrupted time series model [2]. This method consists in identifying structure, i.e., patterns, in the model residuals. The presence of a pattern is a strong signal for a potential model misspecification or a missing variable. In other words, it indicates that part of the dependent variable behavior is captured by the model error and thus remains unexplained. In contrast, when no structure is observed, we can be confident on the model specification and can reasonably assume that no fundamental covariates are missing in the model. In Figure 3, we present the residuals for the number of and health costs from SP around the removal of the moratorium in GE and ZH. For the presented figures, visual inspection confirms that no clear pattern is observed.

*Linearity assumption:* In the case of an interrupted time series model, the most important assumption to satisfy is the linearity assumption [3]. When a linear trend exists, it becomes straightforward to isolate the intervention and predict the counterfactual. As recommended by [4], we verify such assumption by visual inspection of the data and of the residuals, i.e., as provided above. In Figure 4, we present the raw data for the number of SP and the health costs from SP for GE and ZH. As displayed in the figure, visual inspection indicates a linear trend in both the

|    | Removal of the national moratorium |      |               |      |             |      |               |      | Reintroduction of moratoriums |      |               |      |
|----|------------------------------------|------|---------------|------|-------------|------|---------------|------|-------------------------------|------|---------------|------|
|    | $N_t$ of SP                        |      | $C_t$ from SP |      | $N_t$ of GP |      | $C_t$ from GP |      | $N_t$ of SP                   |      | $C_t$ from SP |      |
|    | NB                                 | P    | LN            | W    | NB          | P    | LN            | W    | NB                            | P    | LN            | W    |
| BE | 994                                | 1360 | 2613          | 2630 | 930         | 1042 | 2587          | 2618 | 1161                          | 2426 | 2863          | 2870 |
| GE | 942                                | 1226 | 2585          | 2595 | 862         | 934  | 2480          | 2488 | 1065                          | 1585 | 2843          | 2842 |
| TI | 923                                | 1302 | 2439          | 2462 | 874         | 1073 | 2388          | 2405 | 1069                          | 2004 | 2753          | 2758 |
| VD | 1025                               | 1691 | 2605          | 2613 | 956         | 1241 | 2532          | 2552 | 1168                          | 2557 | 2868          | 2875 |
| VS | 1014                               | 1956 | 2425          | 2437 | 943         | 1372 | 2389          | 2406 | 1152                          | 2903 | 2652          | 2675 |
| ZH | 1029                               | 1452 | 2695          | 2716 | 974         | 1140 | 2678          | n.a. | n.a.                          | n.a. | n.a.          | n.a. |

Note: The observation period for study of the removal of the national moratorium is from 01/2007 to 06/2013 for SP and GP. The reintroduction of cantonal moratoriums only concerns SP and is studied on the period from 01/2012 to 12/2018. The columns " $N_t$ " and " $C_t$ " refer to the number of and the health costs from SP respectively GP. The abbreviations "NB" and "P" mean model fits with a negative binomial respectively a Poisson distribution while "LN" and "W" denote fits with a log-normal and a Weibull distribution respectively. "n.a." stands for not applicable. In fact, in the canton ZH, no moratorium has been reintroduced, see Figure 1, main document.

**Table 11** Goodness-of-fit AIC values for the number of and the health costs from SP and GP in selected cantons.

| Seasonal component | Number of billing |      | Health costs |      |
|--------------------|-------------------|------|--------------|------|
|                    | GP                | SP   | GP           | SP   |
| Additive           | 1.98              | 2.42 | 2.12         | 2.31 |
| Multiplicative     | 1.99              | 2.44 | 2.20         | 2.37 |

**Table 12** Additive and multiplicative autocorrelation results for the seasonal components in the number of billing and the health costs for GP and SP separately.

number of SP and health costs from SP. Further, we remark that the linear trend post-moratorium removal deviates significantly to the linear trend pre-moratorium removal when focusing on the number of SP. This is less the case for the health costs from SP. Finally, let us mention that the methodology applied, and our conclusion on the applicability of interrupted time series model, are identical to Figure 3 in [4].

*Falsification test:* In the following, we apply the falsification test to verify alternative dates on the model applied for the removal of the national moratorium for SP. In particular, this approach allows us to measure if changes in slope are related to the intervention or could be observed also at other dates [5]. For this purpose, we select the alternative dates 06/2008 and 06/2010 since both ensure having enough data points before and after the hypothetical intervention. In Table 13, we present the results of this supplementary analysis for the number of SP and health costs from SP over the 60 months period prior the moratorium removal date. For illustration purposes, we show the results for the five most populated cantons (AG, BE,

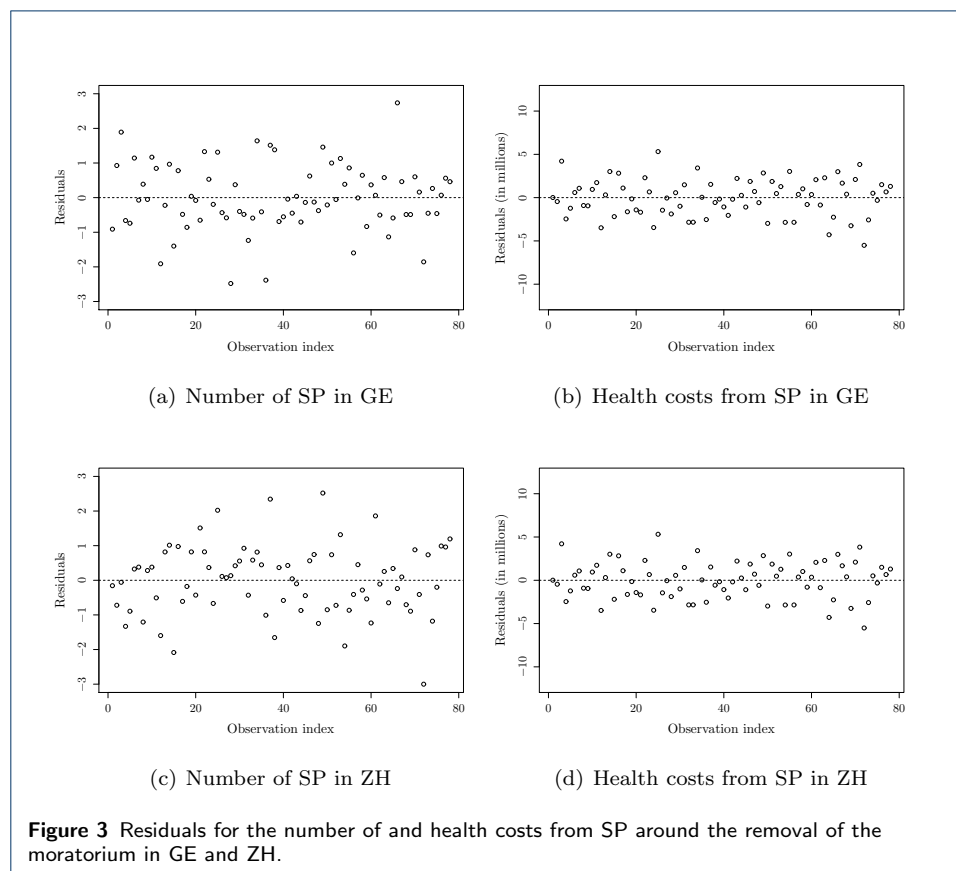

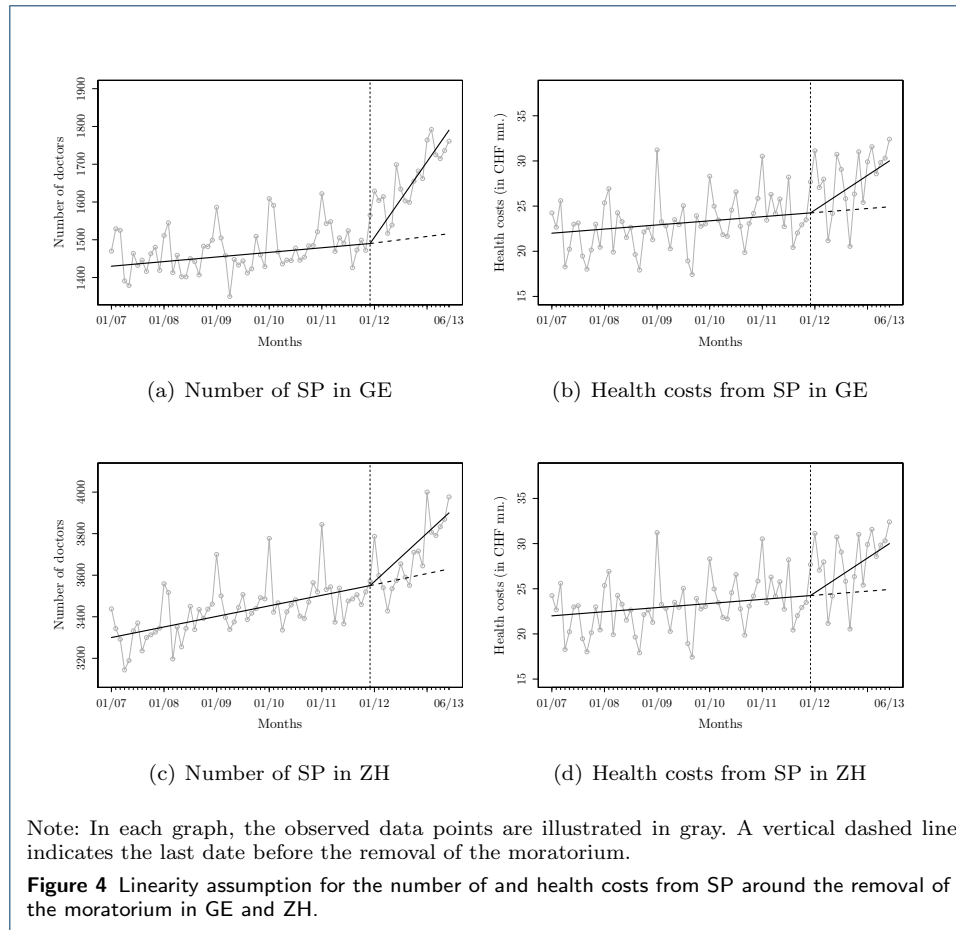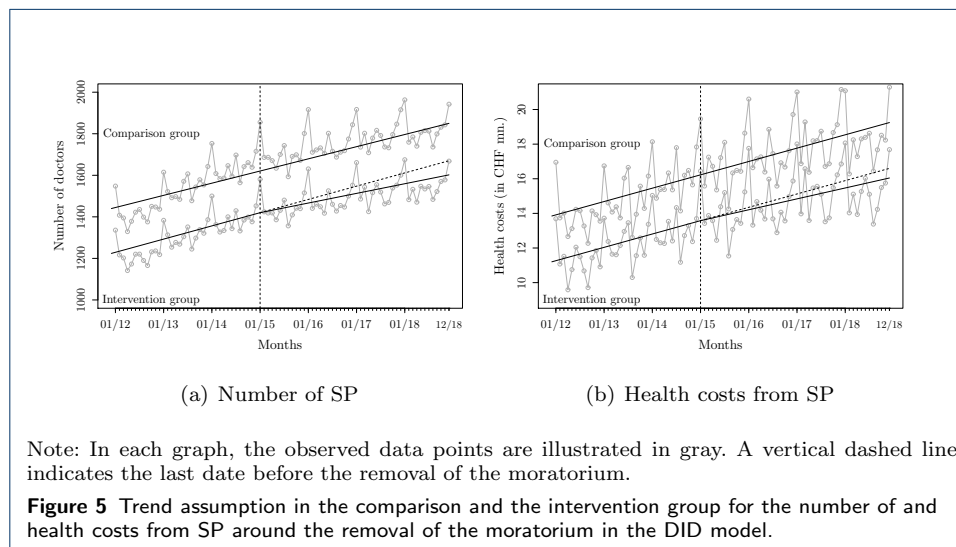

GE, VD and ZH). For both alternative dates, we observe that the coefficients for the moratorium removal (“Rem.”) and for the interaction term (“Month  $\times$  Rem.”) are not statistically significant. As expected, results from this falsification test contrast with the significant factors found in Table 1 of the main article for the number of

SP billing in free practice, i.e., where we clearly observe a significant intervention effect, while they do not diverge from what we observe for the health costs from SP, i.e., where no significant intervention effect has been identified.

| Number of SP billing in free practice |           |          |       |              |  | Health costs from SP |       |       |              |
|---------------------------------------|-----------|----------|-------|--------------|--|----------------------|-------|-------|--------------|
|                                       | Intercept | Month    | Rem.  | Month × Rem. |  | Intercept            | Month | Rem.  | Month × Rem. |
| <i>Alternative date: 06/2008.</i>     |           |          |       |              |  |                      |       |       |              |
| AG                                    | 7.847 *** | .021 *   | .057  | -.000        |  | 16.506 ***           | .028  | .395  | .017         |
| BE                                    | 7.766 *** | .018 *   | .012  | -.002        |  | 17.168 ***           | .029  | .176  | .007         |
| GE                                    | 7.280 *** | -.000    | -.036 | .010         |  | 16.925 ***           | .038  | -.263 | -.006        |
| VD                                    | 7.706 *** | .019 **  | .047  | .005         |  | 16.957 ***           | .035  | .193  | .004         |
| ZH                                    | 8.121 *** | .018 *** | .130  | -.011 *      |  | 17.801 ***           | .023  | .117  | .014         |
| <i>Alternative date: 06/2010.</i>     |           |          |       |              |  |                      |       |       |              |
| AG                                    | 7.907 *** | .023 *** | .088  | -.014        |  | 16.667 ***           | .055  | .159  | -.033        |
| BE                                    | 7.811 *** | .018 *** | .100  | -.014 ***    |  | 17.271 ***           | .037  | .174  | -.009        |
| GE                                    | 7.295 *** | .005     | .101  | .004         |  | 16.954 ***           | .018  | .62   | -.014        |
| VD                                    | 7.768 *** | .023 *** | .089  | -.003        |  | 17.064 ***           | .039  | .447  | -.030        |
| ZH                                    | 8.162 *** | .016 *** | -.053 | -.012        |  | 17.900 ***           | .036  | .453  | -.035        |

Note: Results are based on 60 months, i.e. accounting only for the 60 months before the removal of the moratorium for SP(01/2007–12/2011), see Figure 1, main document. The displayed values for the coefficients for “Month”, “Rem.” and “Month × Rem.” are multiplied by 10. Values account for the seasonal effect. Significance levels are indicated as follows: \*  $p < 0.1$ , \*\*  $p < 0.05$ , \*\*\*  $p < 0.01$ .

**Table 13** Alternative dates test for the SP national moratorium removal in January 2012.

*Control group:* To disentangle the effect of policy under study from any other policy change or any other unobservable factor affecting the outcome variable over time, we tested our model on the control group composed by the cantons having not experienced a moratorium reintroduction (i.e. AG, AI, AR, FR, GR, JU, ZG and ZH). Such analysis is possible only for the moratorium reintroduction since, for the moratorium removal, the political intervention has been effective in all cantons. In Table 14, we present the results for the moratorium reintroduction for the cantons having not experienced reintroduction. As for the results on the treatment group (cf. Table 3, main article), we do not observe any statistically significant coefficients for the interaction term (Month × Reint.).

|    | Intercept  | Month | Reint.  | Month × Reint. |
|----|------------|-------|---------|----------------|
| AG | 16.855 *** | .045  | .609 ** | -.012          |
| AI | 12.914 *** | .028  | .507 ** | -.013          |
| AR | 14.370 *** | .075  | .473 ** | -.045          |
| FR | 16.269 *** | .074  | .159 ** | -.043          |
| GR | 15.477 *** | .058  | .658 ** | -.030          |
| JU | 14.717 *** | .100  | .510 ** | -.055          |
| ZG | 15.361 *** | .046  | .724 ** | -.018          |
| ZH | 18.042 *** | .028  | .792 ** | .005           |

Note: Results are based on 84 months from 01/2012 to 12/2018 including the fictive reintroduction date of 07/2013 on the moratorium for SP. The displayed values for the 95%-confidence interval for “Month”, “Reint.” and “Month × Reint.” are multiplied by 10. Values account for the seasonal effect. Significance levels are indicated as follows: \*  $p < 0.1$ , \*\*  $p < 0.05$ , \*\*\*  $p < 0.01$ .

**Table 14** Regression results for the SP moratorium reintroduction for the cantons having not experienced reintroduction.

*Out-of-sample test:* The out-of-sample test is a powerful tool to assess the forecasting accuracy of a model [6]. In our setup, we use this approach to compare whether our model results (model) post moratorium removal diverge from the forecast on the same period (out-of-sample) obtained from fitting the model only on the 60 months prior intervention. In doing so, we bring further evidence for the results presented in the main part of the manuscript that rely on  $p$ -values. In Figure 6, we present the model and the out-of-sample predictions for the number of and health costs from SP for the moratorium removal in GE and ZH. Considering the number of SP in GE and ZH in the period post moratorium removal, we note that the confidence intervals of the model predictions diverge from the ones of the out-of-sample predictions. This confirms that the removal has led to a significant increase in the number of SP. We conclude the opposite when focusing on the health costs from SP in GE and ZH since the confidence intervals of the model and the out-of-sample predictions intersect on the post-intervention period.

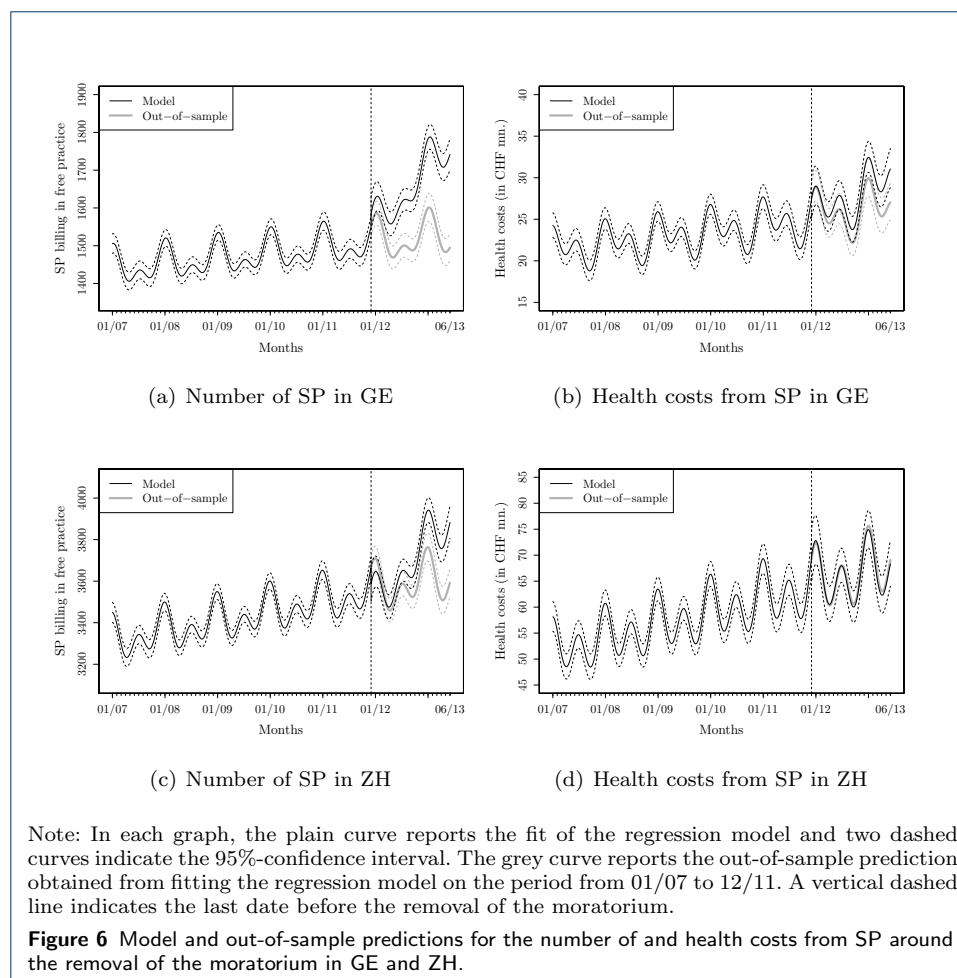

Finally, Tables 18 and 19 present the  $p$ -values for the policy intervention and the interaction effect coefficients for both the moratorium removal and reintroduction when using the Bonferroni method. In doing so, we account for multiple testing. Results are only reported for the intervention and interaction variables. The results after correction are similar to the original ones (cf. Tables 1 and 3)

|    | Number of SP billing in free practice |          |              |          | Health costs from SP |          |              |          |
|----|---------------------------------------|----------|--------------|----------|----------------------|----------|--------------|----------|
|    | Rem.                                  |          | Month × Rem. |          | Rem.                 |          | Month × Rem. |          |
|    | Initial                               | Adjusted | Initial      | Adjusted | Initial              | Adjusted | Initial      | Adjusted |
| AG | 0.087                                 | 1.000    | 0.000        | 0.002    | 0.113                | 1.000    | 0.079        | 1.000    |
| AI | 0.319                                 | 1.000    | 0.643        | 1.000    | 0.259                | 1.000    | 0.175        | 1.000    |
| AR | 0.007                                 | 0.179    | 0.309        | 1.000    | 0.431                | 1.000    | 0.432        | 1.000    |
| BE | 0.049                                 | 1.000    | 0.009        | 0.229    | 0.009                | 0.242    | 0.374        | 1.000    |
| BL | 0.159                                 | 1.000    | 0.019        | 0.507    | 0.837                | 1.000    | 0.020        | 0.515    |
| BS | 0.034                                 | 0.889    | 0.000        | 0.000    | 0.697                | 1.000    | 0.545        | 1.000    |
| FR | 0.064                                 | 1.000    | 0.000        | 0.002    | 0.888                | 1.000    | 0.778        | 1.000    |
| GE | 0.058                                 | 1.000    | 0.000        | 0.000    | 0.227                | 1.000    | 0.206        | 1.000    |
| GL | 0.671                                 | 1.000    | 0.145        | 1.000    | 0.324                | 1.000    | 0.011        | 0.296    |
| GR | 0.001                                 | 0.025    | 0.000        | 0.000    | 0.382                | 1.000    | 0.780        | 1.000    |
| JU | 0.920                                 | 1.000    | 0.053        | 1.000    | 0.669                | 1.000    | 0.037        | 0.954    |
| LU | 0.354                                 | 1.000    | 0.000        | 0.000    | 0.000                | 0.007    | 0.650        | 1.000    |
| NE | 0.772                                 | 1.000    | 0.054        | 1.000    | 0.278                | 1.000    | 0.786        | 1.000    |
| NW | 0.573                                 | 1.000    | 0.634        | 1.000    | 0.665                | 1.000    | 0.250        | 1.000    |
| OW | 0.962                                 | 1.000    | 0.344        | 1.000    | 0.014                | 0.354    | 0.344        | 1.000    |
| SG | 0.490                                 | 1.000    | 0.001        | 0.038    | 0.084                | 1.000    | 0.836        | 1.000    |
| SH | 0.111                                 | 1.000    | 0.002        | 0.049    | 0.054                | 1.000    | 0.002        | 0.055    |
| SO | 0.036                                 | 0.941    | 0.003        | 0.072    | 0.338                | 1.000    | 0.940        | 1.000    |
| SZ | 0.286                                 | 1.000    | 0.036        | 0.934    | 0.088                | 1.000    | 0.285        | 1.000    |
| TG | 0.425                                 | 1.000    | 0.162        | 1.000    | 0.103                | 1.000    | 0.798        | 1.000    |
| TI | 0.656                                 | 1.000    | 0.022        | 0.580    | 0.363                | 1.000    | 0.340        | 1.000    |
| UR | 0.511                                 | 1.000    | 0.012        | 0.308    | 0.948                | 1.000    | 0.000        | 0.000    |
| VD | 0.932                                 | 1.000    | 0.011        | 0.277    | 0.074                | 1.000    | 0.801        | 1.000    |
| VS | 0.784                                 | 1.000    | 0.317        | 1.000    | 0.668                | 1.000    | 0.690        | 1.000    |
| ZG | 0.771                                 | 1.000    | 0.009        | 0.223    | 0.076                | 1.000    | 0.491        | 1.000    |
| ZH | 0.096                                 | 1.000    | 0.000        | 0.000    | 0.168                | 1.000    | 0.074        | 1.000    |

**Table 15** *p*-values by cantons for the SP national moratorium removal in January 2012. The displayed values for the “adjusted” *p*-values are for the Bonferroni multiple testing adjustment method.

|    | Number of SP billing in free practice |          |                |          | Health costs from SP |          |                |          |
|----|---------------------------------------|----------|----------------|----------|----------------------|----------|----------------|----------|
|    | Reint.                                |          | Month × Reint. |          | Reint.               |          | Month × Reint. |          |
|    | Initial                               | Adjusted | Initial        | Adjusted | Initial              | Adjusted | Initial        | Adjusted |
| BE | 0.815                                 | 1.000    | 0.000          | 0.000    | 0.620                | 1.000    | 0.064          | 1.000    |
| BL | 0.001                                 | 0.014    | 0.000          | 0.000    | 0.992                | 1.000    | 0.000          | 0.001    |
| BS | 0.068                                 | 1.000    | 0.000          | 0.000    | 0.771                | 1.000    | 0.034          | 0.621    |
| GE | 0.840                                 | 1.000    | 0.000          | 0.000    | 0.235                | 1.000    | 0.047          | 0.853    |
| GL | 0.000                                 | 0.000    | 0.003          | 0.050    | 0.002                | 0.027    | 0.024          | 0.427    |
| LU | 0.004                                 | 0.067    | 0.019          | 0.343    | 0.282                | 1.000    | 0.937          | 1.000    |
| NE | 0.013                                 | 0.228    | 0.279          | 1.000    | 0.007                | 0.131    | 0.572          | 1.000    |
| NW | 0.001                                 | 0.013    | 0.003          | 0.046    | 0.166                | 1.000    | 0.109          | 1.000    |
| OW | 0.074                                 | 1.000    | 0.928          | 1.000    | 0.614                | 1.000    | 0.365          | 1.000    |
| SG | 0.000                                 | 0.000    | 0.000          | 0.003    | 0.000                | 0.000    | 0.211          | 1.000    |
| SH | 0.034                                 | 0.610    | 0.003          | 0.058    | 0.068                | 1.000    | 0.021          | 0.370    |
| SO | 0.000                                 | 0.007    | 0.003          | 0.050    | 0.058                | 1.000    | 0.070          | 1.000    |
| SZ | 0.045                                 | 0.813    | 0.013          | 0.231    | 0.066                | 1.000    | 0.586          | 1.000    |
| TG | 0.002                                 | 0.028    | 0.012          | 0.213    | 0.028                | 0.511    | 0.298          | 1.000    |
| TI | 0.000                                 | 0.000    | 0.000          | 0.008    | 0.047                | 0.840    | 0.511          | 1.000    |
| UR | 0.134                                 | 1.000    | 0.064          | 1.000    | 0.919                | 1.000    | 0.001          | 0.010    |
| VD | 0.010                                 | 0.175    | 0.110          | 1.000    | 0.292                | 1.000    | 0.900          | 1.000    |
| VS | 0.433                                 | 1.000    | 0.421          | 1.000    | 0.401                | 1.000    | 0.420          | 1.000    |

**Table 16** *p*-values by cantons for the SP national moratorium reintroduction. The displayed values for the “adjusted” *p*-values are for the Bonferroni multiple testing adjustment method.

#### Acknowledgements

All authors thank Stéphane Luyet for his invaluable support. Further, the authors are thankful for the comments on earlier versions of this manuscript from participants of the Swiss Health Economics Workshop (Lucerne, Sept. 2019). The provision of the aggregated SASIS data for this research is gratefully acknowledged.

#### Funding

The authors acknowledge financial support from the Swiss National Science Foundation (grant no. 100018.169662 and grant no. CRSII5.180350).

**Availability of data and materials**

The data used in this article is not publicly available as it is the property of private organizations (Swiss health insurers). Link to the data: <https://www.sasis.ch/>. The data can be requested from this organization. No administrative permissions were required to obtain the SASIS data.

**Ethics approval and consent to participate**

Ethics approval and consent to participate on research with macro-level data is not required, in Switzerland (<https://submissions.swissethics.ch/en/>). No administrative permissions were required to obtain the SASIS data.

**Competing interests**

The authors declare that they have no competing interests.

**Consent for publication**

Not applicable.

**Authors' contributions**

All authors made substantial contributions to the conception and design of the work, the analysis and interpretation of data and drafted and revised the work. All authors have read and approved the manuscript.

**Author details**

<sup>1</sup>Department of Actuarial Science, University of Lausanne, Chamberonne - Extranef, 1015 Lausanne, Switzerland.

<sup>2</sup>Department of Political Studies, University of Lausanne, Géopolis, 1015 Lausanne, Switzerland. <sup>3</sup>Swiss Finance Institute, University of Lausanne, Chamberonne - Extranef, 1015 Lausanne, Switzerland.

**References**

1. Stock, J.H., Watson, M.W.: Introduction to Econometrics, 3rd edn. Pearson, New York (2015)
2. Wagner III, J.A., Rubin, P.A., Callahan, T.J.: Incentive payment and nonmanagerial productivity: An interrupted time series analysis of magnitude and trend. *Organizational Behavior and Human Decision Processes* **42**(1), 47–74 (1988)
3. Wagner, A.K., Soumerai, S.B., Zhang, F., Ross-Degnan, D.: Segmented regression analysis of interrupted time series studies in medication use research. *Journal of clinical pharmacy and therapeutics* **27**(4), 299–309 (2002)
4. Bernal, J.L., Cummins, S., Gasparrini, A.: Interrupted Time Series Regression for the Evaluation of Public Health Interventions: A Tutorial. *International Journal of Epidemiology* **46**(1), 348–355 (2017). doi:[10.1093/ije/dyw098](https://doi.org/10.1093/ije/dyw098)
5. Chamlin, M.B., Burek, M.W., Cochran, J.K.: Welfare policy as social control: A specific test of the piven and cloward thesis. *Criminal Justice Policy Review* **18**(2), 132–152 (2007)
6. Tashman, L.J.: Out-of-sample tests of forecasting accuracy: an analysis and review. *International journal of forecasting* **16**(4), 437–450 (2000)
